# Supplementary material for: Site-selection and adaptive reconstruction in a two-dimensional nanoporous network in response to guest inclusion
Source: Royal Society of Chemistry journal article supplement (doi:10.1039/c5ra01517k), 2015-01-01
Supplement: c5ra01517k2.pdf [file c5ra01517k2.pdf]

## Site-selection and adaptive reconstruction in a two-dimensional nanoporous network in response to guest inclusion

JinDong Xue,<sup>ab</sup> Ke Deng,<sup>\*b</sup> Bo Liu,<sup>a</sup> WuBiao Duan,<sup>\*a</sup> QingDao Zeng<sup>\*b</sup> and Chen  
Wang<sup>\*b</sup>

*<sup>a</sup> Department of Chemistry, School of Science, Beijing Jiaotong University, Beijing, 100044, China.*

*E-mail: wbduan@bjtu.edu.cn*

*<sup>b</sup> CAS Key Laboratory of Standardization and Measurement for Nanotechnology, National Center  
for Nanoscience and Technology, Beijing, 100190, China. E-mail: zengqd@nanoctr.cn;*

*wangch@nanoctr.cn; kdeng@nanoctr.cn*

## LIST OF CONTENTS

- 1、 STM image of the self-assembled structure of NN4A.....S1
- 2、 STM image of the self-assembled structure of the NN4A/DPE networks.....S2

1、 STM image of the self-assembled structure of NN4A.

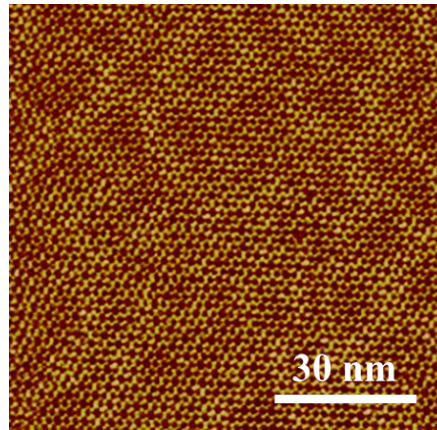

Figure S1. A large scale STM image of the self-assembled structure of NN4A networks on the HOPG surface.  $I_{\text{set}} = 330.2 \text{ pA}$ ;  $V_{\text{bias}} = 685.1 \text{ mV}$ .

2、 STM image of the self-assembled structure of NN4A/DPE.

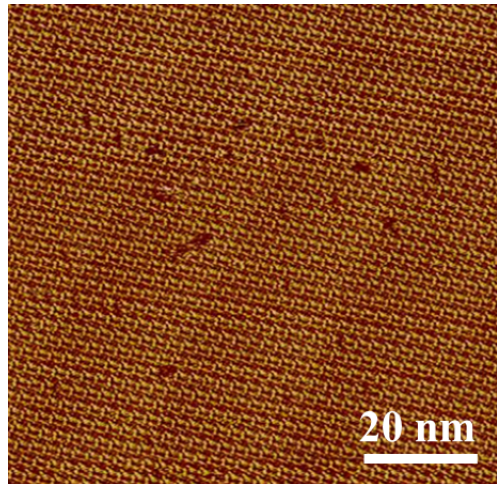

Figure S2. A large scale STM image of the self-assembled structure of NN4A/DPE networks on the HOPG surface.  $I_{\text{set}} = 368.6 \text{ pA}$ ;  $V_{\text{bias}} = 669.3 \text{ mV}$ .
